# Supplementary material for: Dysregulation in the Unfolded Protein Response in the FGR Rat Pancreas
Source: Hindawi journal article supplement (doi:10.1155/2020/5759182), 2020-01-20
Supplement: f1 [file 5759182.f1.pdf]

**Supplement table 1. Composition of rat diets**

|               | <b>Standard diet (%)</b> | <b>LP diet (%)</b> |
|---------------|--------------------------|--------------------|
| Protein       | 22.2                     | 7                  |
| Fat           | 4.8                      | 6.9                |
| Carbohydrates | 61.2                     | 74.7               |
| Ca            | 1.62                     | 0.53               |
| P             | 0.92                     | 0.3                |
| Calories      | 399 kcal/100 g           | 395 kcal/100 g     |

LP, low protein

**Supplement table 2. Antibodies for western blotting, IHC and IF**

| Target protein    | Source | Company     | Ref.      | Dilution |
|-------------------|--------|-------------|-----------|----------|
| Bip               | Rabbit | CST         | 3177      | 1:1000   |
| Atf6              | Rabbit | Proteintech | 24169-1   | 1:500    |
| Hspa1l            | Rabbit | Proteintech | 13970-1   | 1:2000   |
| Herpud1           | Rabbit | Abcam       | ab150424  | 1:1000   |
| Creb3l3           | Rabbit | Immunoway   | YN1809    | 1:1000   |
| Atf4              | Rabbit | Proteintech | 10835-1   | 1:1000   |
| Perk              | Rabbit | Immunoway   | YT6126    | 1:1000   |
| eIF2 $\alpha$     | Rabbit | CST         | 5324      | 1:1000   |
| p-eIF2 $\alpha$   | Rabbit | CST         | 3398      | 1:500    |
| Xbp1              | Rabbit | Enogene     | E90127    | 1:500    |
| Jnk1              | Rabbit | CST         | 3708      | 1:500    |
| Pdx1              | Rabbit | Enogene     | E2A7170   | 1:500    |
| Beclin1           | Rabbit | Proteintech | 11306-1   | 1:500    |
| LC3               | Rabbit | CST         | 2775      | 1:1000   |
| Ampk              | Rabbit | Enogene     | E1A6423   | 1:1000   |
| p-Ampk            | Rabbit | Enogene     | E1A3423   | 1:1000   |
| Cleavage-caspase3 | Rabbit | Absin       | abs132005 | 1:1000   |
| Bax               | Rabbit | SAB         | 40635     | 1:1000   |
| Bcl-2             | Rabbit | Enogene     | E1A6139   | 1:3000   |
| Cleavage-caspase8 | Rabbit | Enogene     | E1A5267   | 1:2000   |
| Cleavage-caspase9 | Rabbit | Wanlei      | WL01838   | 1:1000   |
| Caspase-12        | Rabbit | Wanlei      | WL03268   | 1:500    |
| Insulin           | mouse  | Proteintech | 66198-1   | 1:100    |
| $\beta$ -actin    | mouse  | Proteintech | 66009-1   | 1:5000   |

**Supplement table 3. Primers for qPCR**

| <b>Gene name</b> | <b>Accession Number</b> | <b>Primer Sequences (5'-3')</b>               | <b>Size (bp)</b> | <b>Annealing temp (°C)</b> |
|------------------|-------------------------|-----------------------------------------------|------------------|----------------------------|
| Atf2             | NM_031018.1             | GACAAACCATGCCCGTTGCT<br>GGACCGGTTGAGGAGAGGA   | 141              | 60                         |
| Atf4             | NM_024403.2             | CTTCTCCAGGTGTTCTCGTT<br>GCTCAGCCCTCTTCTTCTG   | 162              | 60                         |
| Atf6             | NM_001107196.1          | GATTTGATGCCTTGGGAGTC<br>GGACCGAGGAGAAGAGACAG  | 122              | 60                         |
| Bip1             | NM_013083.2             | CCCAGGTCAAACACGAGGA<br>GCGGCAAGCAACCAAGGAT    | 137              | 60                         |
| Creb3l3          | NM_001012115            | ATAGCGGTCCTTCTGCTGTC<br>CTGTGCACTTTGTTGGCAGT  | 77               | 60                         |
| Chop             | NM_001109986.1          | GGCTTTGGGAGGTGCTTGTG<br>CTGCCTTTGCCTTTGAGAC   | 201              | 60                         |
| Dnajc1           | XM_002728514.4          | AGACAGTGACCTCAGAAGCC<br>AGCTTCTCCTCTGGTTCCAC  | 88               | 60                         |
| Dnajc2           | NM_053776               | AGAGAAGTCAACCGGCAGAA<br>CCCATCTGGAGTTTGTCCCA  | 113              | 60                         |
| Grp94            | NM_001012197.2          | AAGGTCATTGTCACGTGAAAA<br>GTGTTTCCTCTTGGGTCAGC | 97               | 60                         |
| Hspa1l           | NM_212546.4             | TCTCGTCCATGGTGTGACC<br>GTGGCCTGTCTCTGGGAGTC   | 108              | 60                         |
| Herpud1          | NM_053523               | CGGACAACACTAGTCAGGCA<br>GCTTCAGGCCTAGAGACGTT  | 118              | 60                         |
| Perk             | NM_031599.2             | GTGCTCCGCTTATTCCTTT<br>CCTGTCTTGGTTGGGTCTG    | 158              | 60                         |
| Xbp1             | NM_001004210.2          | GATGAATGCCCTGGTTACTG<br>AGATGTTCTGGGGAGGTGAC  | 152              | 60                         |
| $\beta$ -actin   | NM_031144               | AGTCCCTCACCTCCAAAAG<br>AAGCAATGCTGTACCTTCCC   | 95               | 60                         |

**Supplement table 4.** Relative expression of the 84 UPR-related genes by PCR Arrays

| Gene Symbol | AVG DeltaCt |           | 2 <sup>Δ(-DeltaCt)</sup> |          | Fold Difference (F/C) | T-TEST (p value) | Up- or Down-Regulation (F/C) |
|-------------|-------------|-----------|--------------------------|----------|-----------------------|------------------|------------------------------|
|             | FGR         | Control   | FGR                      | Control  |                       |                  |                              |
| Atf4        | 0.644444    | 1.89      | 0.639739                 | 0.269807 | 2.3711                | 0.03574          | 2.3711                       |
| Atf6        | 4.527778    | 5.9       | 0.043351                 | 0.016746 | 2.5887                | 0.02258          | 2.5887                       |
| Atxn3       | 6.067778    | 5.836667  | 0.014908                 | 0.017498 | 0.852                 | 0.49245          | -1.1737                      |
| Bax         | 4.257778    | 4.14      | 0.052273                 | 0.05672  | 0.9216                | 0.73868          | -1.0851                      |
| Calr        | -0.355556   | -0.17     | 1.279478                 | 1.125058 | 1.1373                | 0.64846          | 1.1373                       |
| Canx        | 1.227778    | 1.43      | 0.426975                 | 0.371131 | 1.1505                | 0.64141          | 1.1505                       |
| Cct4        | 0.644444    | 0.65      | 0.639739                 | 0.63728  | 1.0039                | 0.92961          | 1.0039                       |
| Cct7        | 0.904444    | 0.91      | 0.534238                 | 0.532185 | 1.0039                | 0.90484          | 1.0039                       |
| Cebpb       | 9.411111    | 9.85      | 0.001469                 | 0.001084 | 1.3556                | 0.46276          | 1.3556                       |
| Creb3       | 4.057778    | 3.823333  | 0.060046                 | 0.070642 | 0.85                  | 0.63122          | -1.1765                      |
| Creb3l1     | 5.217778    | 5.52      | 0.026872                 | 0.021793 | 1.233                 | 0.44966          | 1.233                        |
| Creb3l2     | 5.464444    | 5.64      | 0.022648                 | 0.020054 | 1.1294                | 0.55933          | 1.1294                       |
| Creb3l3     | 11.384444   | 8.776667  | 0.000374                 | 0.00228  | 0.1641                | 0.02855          | -6.0956                      |
| Creb3l4     | 7.134444    | 7.49      | 0.007117                 | 0.005563 | 1.2795                | 0.44939          | 1.2795                       |
| Ddit3       | 5.041111    | 5.33      | 0.030372                 | 0.024861 | 1.2217                | 0.35244          | 1.2217                       |
| Derl1       | 3.854444    | 4.466667  | 0.069135                 | 0.045227 | 1.5286                | 0.17998          | 1.5286                       |
| Dnajb9      | 4.347778    | 4.913333  | 0.049112                 | 0.033185 | 1.48                  | 0.38759          | 1.48                         |
| Dnajc10     | 5.084444    | 5         | 0.029473                 | 0.03125  | 0.9431                | 0.86299          | -1.0603                      |
| Dnajc3      | 0.867778    | 1.503333  | 0.54799                  | 0.352737 | 1.5535                | 0.20002          | 1.5535                       |
| Dnajc4      | 6.611111    | 6.71      | 0.01023                  | 0.009552 | 1.0709                | 0.61378          | 1.0709                       |
| Tor1a       | 3.564444    | 4.14      | 0.084527                 | 0.05672  | 1.4903                | 0.2162           | 1.4903                       |
| Edem1       | 2.354444    | 2.906667  | 0.195543                 | 0.133354 | 1.4663                | 0.09532          | 1.4663                       |
| Edem2       | 2.984444    | 3.78      | 0.126355                 | 0.072796 | 1.7357                | 0.24519          | 1.7357                       |
| Eif2a       | 4.447778    | 4.283333  | 0.045823                 | 0.051356 | 0.8923                | 0.37229          | -1.1207                      |
| Eif2ak2     | 6.337778    | 5.716667  | 0.012363                 | 0.019016 | 0.6502                | 0.07429          | -1.5381                      |
| Eif2ak3     | 3.141111    | 4.806667  | 0.113353                 | 0.035731 | 3.1724                | 0.0135           | 3.1724                       |
| Eif2ak4     | 4.274444    | 4.513333  | 0.051673                 | 0.043788 | 1.1801                | 0.40182          | 1.1801                       |
| Ern2        | 12.21777    | 12.79     | 0.00021                  | 0.000141 | 1.4868                | 0.9304           | 1.4868                       |
| Ero1a       | 3.691111    | 3.696667  | 0.077422                 | 0.077125 | 1.0039                | 0.96113          | 1.0039                       |
| Fbxo6       | 4.671111    | 4.666667  | 0.039251                 | 0.039373 | 0.9969                | 0.93576          | -1.0031                      |
| Ganab       | 2.544444    | 3.706667  | 0.171414                 | 0.076592 | 2.238                 | 0.0538           | 2.238                        |
| Herpud1     | 1.717778    | 3.33      | 0.304017                 | 0.099442 | 3.0572                | 0.03835          | 3.0572                       |
| Herpud2     | 4.637778    | 4.603333  | 0.040169                 | 0.041139 | 0.9764                | 0.95874          | -1.0242                      |
| Hsp90b1     | -0.758889   | -0.41     | 1.692187                 | 1.328686 | 1.2736                | 0.38418          | 1.2736                       |
| Hspa1l      | 10.481111   | 12.346667 | 0.0007                   | 0.000192 | 3.6441                | 0.01559          | 3.6441                       |
| Hspa2       | 8.094444    | 8.233333  | 0.003659                 | 0.003323 | 1.1011                | 0.63983          | 1.1011                       |
| Hspa4       | 3.107778    | 3.016667  | 0.116002                 | 0.123564 | 0.9388                | 0.68541          | -1.0652                      |
| Hspa4l      | 7.964444    | 8.063333  | 0.004004                 | 0.003738 | 1.0709                | 0.97953          | 1.0709                       |
| Hspa5       | -0.225556   | 0.383333  | 1.169227                 | 0.766664 | 1.5251                | 0.37605          | 1.5251                       |
| Hspb9       | 12.671111   | 11.74     | 0.000153                 | 0.000292 | 0.5245                | 0.13703          | -1.9067                      |
| Hsph1       | 6.351111    | 6.196667  | 0.01225                  | 0.013634 | 0.8985                | 0.72709          | -1.113                       |
| Htra2       | 2.587778    | 3.066667  | 0.166342                 | 0.119355 | 1.3937                | 0.06507          | 1.3937                       |
| Htra4       | 10.211111   | 9.546667  | 0.000844                 | 0.001337 | 0.6309                | 0.21535          | -1.585                       |
| Insig1      | 3.041111    | 3.166667  | 0.121488                 | 0.111362 | 1.0909                | 0.78615          | 1.0909                       |
| Insig2      | 6.087778    | 6.043333  | 0.014703                 | 0.015163 | 0.9697                | 0.93743          | -1.0313                      |
| Manf        | 0.931111    | 1.476667  | 0.524454                 | 0.359318 | 1.4596                | 0.2923           | 1.4596                       |
| Mapk10      | 9.374444    | 8.983333  | 0.001507                 | 0.001976 | 0.7625                | 0.51065          | -1.3114                      |
| Mapk8       | 5.441111    | 5.566667  | 0.023018                 | 0.021099 | 1.0909                | 0.61933          | 1.0909                       |

|                 |           |           |           |          |        |         |         |
|-----------------|-----------|-----------|-----------|----------|--------|---------|---------|
| <b>Mapk9</b>    | 4.057778  | 4.2       | 0.060046  | 0.054409 | 1.1036 | 0.58014 | 1.1036  |
| <b>Mbtps1</b>   | 3.627778  | 4.153333  | 0.080897  | 0.056198 | 1.4395 | 0.3491  | 1.4395  |
| <b>Mbtps2</b>   | 5.567778  | 5.546667  | 0.021083  | 0.021394 | 0.9855 | 0.89622 | -1.0147 |
| <b>Nploc4</b>   | 4.091111  | 3.976667  | 0.058675  | 0.063519 | 0.9237 | 0.8021  | -1.0826 |
| <b>Nucb1</b>    | 3.287778  | 3.703333  | 0.102395  | 0.076769 | 1.3338 | 0.33322 | 1.3338  |
| <b>Os9</b>      | 2.847778  | 3.47      | 0.13891   | 0.090246 | 1.5392 | 0.30407 | 1.5392  |
| <b>Pdia3</b>    | 0.311111  | 0.583333  | 0.806021  | 0.66742  | 1.2077 | 0.56273 | 1.2077  |
| <b>Pfdn5</b>    | 2.267778  | 2.256667  | 0.207649  | 0.209255 | 0.9923 | 0.8695  | -1.0077 |
| <b>Pfdn6</b>    | 2.941111  | 2.96      | 0.130208  | 0.128514 | 1.0132 | 0.82495 | 1.0132  |
| <b>Ppia</b>     | -2.508889 | -2.623333 | 5.691815  | 6.161721 | 0.9237 | 0.54464 | -1.0826 |
| <b>Ppib</b>     | -1.635556 | -1.29     | 3.107072  | 2.445281 | 1.2706 | 0.29974 | 1.2706  |
| <b>Ppic</b>     | 2.891111  | 2.963333  | 0.1348    | 0.128218 | 1.0513 | 0.61458 | 1.0513  |
| <b>Ppp1r15a</b> | 11.084444 | 11.403333 | 0.000461  | 0.000369 | 1.2474 | 0.25049 | 1.2474  |
| <b>Ppp1r15b</b> | 3.174444  | 3.736667  | 0.110764  | 0.075016 | 1.4765 | 0.3364  | 1.4765  |
| <b>PrkcsH</b>   | 2.821111  | 3.206667  | 0.141501  | 0.108317 | 1.3064 | 0.31514 | 1.3064  |
| <b>Rnf139</b>   | 3.464444  | 3.833333  | 0.090594  | 0.070154 | 1.2914 | 0.15107 | 1.2914  |
| <b>Rpn1</b>     | -0.592222 | -0.193333 | 1.507567  | 1.143402 | 1.3185 | 0.32289 | 1.3185  |
| <b>Scap</b>     | 2.271111  | 3.29      | 0.20717   | 0.102238 | 2.0264 | 0.29193 | 2.0264  |
| <b>Sec62</b>    | 1.241111  | 1.41      | 0.423047  | 0.376312 | 1.1242 | 0.43421 | 1.1242  |
| <b>Sec63</b>    | 3.044444  | 3.253333  | 0.121208  | 0.104869 | 1.1558 | 0.43616 | 1.1558  |
| <b>Sel1l</b>    | 1.474444  | 2.87      | 0.359872  | 0.136787 | 2.6309 | 0.08426 | 2.6309  |
| <b>Vimp</b>     | 2.161111  | 2.316667  | 0.223584  | 0.200731 | 1.1139 | 0.50979 | 1.1139  |
| <b>Serp1</b>    | -1.282222 | -0.873333 | 2.432133  | 1.831891 | 1.3277 | 0.45539 | 1.3277  |
| <b>Sil1</b>     | 5.341111  | 6.206667  | 0.02467   | 0.01354  | 1.822  | 0.07869 | 1.822   |
| <b>Srebf1</b>   | 10.341111 | 10.51     | 0.000771  | 0.000686 | 1.1242 | 0.73574 | 1.1242  |
| <b>Srebf2</b>   | 8.384444  | 9.073333  | 0.002992  | 0.001856 | 1.612  | 0.18618 | 1.612   |
| <b>Syvn1</b>    | 3.894444  | 4.336667  | 0.067244  | 0.049492 | 1.3587 | 0.37585 | 1.3587  |
| <b>Tcp1</b>     | 1.751111  | 1.703333  | 0.297073  | 0.307076 | 0.9674 | 0.92308 | -1.0337 |
| <b>Ube2g2</b>   | 5.804444  | 6.196667  | 0.017893  | 0.013634 | 1.3124 | 0.37226 | 1.3124  |
| <b>Ube2j2</b>   | 4.667778  | 4.74      | 0.039342  | 0.037421 | 1.0513 | 0.6841  | 1.0513  |
| <b>Ubxn4</b>    | 2.964444  | 3.493333  | 0.128119  | 0.088798 | 1.4428 | 0.03773 | 1.4428  |
| <b>Ufd1l</b>    | 4.097778  | 4.423333  | 0.058404  | 0.046606 | 1.2531 | 0.17838 | 1.2531  |
| <b>Uggt1</b>    | 3.954444  | 4.133333  | 0.064505  | 0.056983 | 1.132  | 0.71615 | 1.132   |
| <b>Usp14</b>    | 3.154444  | 3.34      | 0.11231   | 0.098755 | 1.1373 | 0.30157 | 1.1373  |
| <b>Vcp</b>      | 1.221111  | 1.533333  | 0.428952  | 0.345478 | 1.2416 | 0.30008 | 1.2416  |
| <b>Xbp1</b>     | 1.317778  | 2.84      | 0.401152  | 0.139661 | 2.8723 | 0.09153 | 2.8723  |
| <b>Actb</b>     | -3.032222 | -2.926667 | 8.180688  | 7.603516 | 1.0759 | 0.64805 | 1.0759  |
| <b>B2m</b>      | 0.361111  | 0.353333  | 0.778565  | 0.782773 | 0.9946 | 0.97205 | -1.0054 |
| <b>Hprt1</b>    | 2.671111  | 2.573333  | 0.157006  | 0.168016 | 0.9345 | 0.36109 | -1.0701 |
| <b>Ldha</b>     | 1.571111  | 1.636667  | 0.336549  | 0.321599 | 1.0465 | 0.60043 | 1.0465  |
| <b>Rplp1</b>    | -3.375556 | -2.89     | 10.378712 | 7.412704 | 1.4001 | 0.27865 | 1.4001  |

CT: threshold cycle; F/C: FGR/control relative expression.
